# Supplementary material for: Identification of Low-Nitrogen-Related miRNAs and Their Target Genes in Sugarcane and the Role of miR156 in Nitrogen Assimilation
Source: MDPI journal article supplement (doi:10.3390/ijms232113187), 2022-10-29
Supplement: s1 [file s1]

**Table S5** The qRT-PCR primers for *miR156* and N metabolism key genes in transgenic *Arabidopsis*

| Group ID | MiRNA and gene    | Forward primer (5'-3')       | Reverse primer (5'-3')        |
|----------|-------------------|------------------------------|-------------------------------|
| 1        | <i>miR156</i>     | ACACTCCAGCTGGGTGACAGAAGAGAGT | TGGTGTCGTGGAGTCG              |
| 2        | <i>18S rRNA</i>   | CTACGTCCCTGCCCTTTGTACA       | ACACTTCACCGGACCATTCAA         |
| 3        | <i>NRT1.1</i>     | TAAGGGATCAGGAAGCGGGA         | TGGAACGGTCCAATGTCTCG          |
| 4        | <i>AMT1.1</i>     | ATCGCTGAACGGACACAGTT         | GCCCATCCATCAACTGACCA          |
| 5        | <i>NR2</i>        | CCACGTCCCTAAAGCCCAAT         | TCTGTTCCCTACGGCGGTTC          |
| 6        | <i>NR1</i>        | GAAACTAGCAATGCTCGCCG         | ATCCTCGGTTCTGTTTGCGT          |
| 7        | <i>GS1</i>        | CTAGTGAGCTCATGCCAGGG         | TCAGGAGCAGGCTTTCCTTG          |
| 8        | <i>GDH1</i>       | GCTAGGCTTCTTGGTCTGGA         | GGGACCTCTTGCAATTGTCGT         |
| 9        | <i>FD-GOGAT</i>   | AGCTTTAAGACCTCAGGTTGCT       | G TTCCTTG GCCCAGACGTTA        |
| 10       | <i>NADH-GOGAT</i> | AGGACACACAGGCGTAAAGG         | AGGGCAAAAACAAGAAGCAGG         |
| 11       | <i>NIR1</i>       | GTCTTAGCTTCGTGGGGCTT         | GGCTACCGGTACAAGCAACT          |
| 12       | <i>UBQ10</i>      | AGAAGTTCAATGTTTCGTTTCATGTAA  | GAACGGAAACATAGTAGAACACTTATTCA |
