# Supplementary material for: Identification of Low-Nitrogen-Related miRNAs and Their Target Genes in Sugarcane and the Role of miR156 in Nitrogen Assimilation
Source: MDPI journal article supplement (doi:10.3390/ijms232113187), 2022-10-29
Supplement: s1 [file s1]

**Table S3** The sequences and stem loop primers of miRNAs in sugarcane

| Group ID | MiRNA            | Sequene                  | Stem loop primer                             |
|----------|------------------|--------------------------|----------------------------------------------|
| 1        | <i>miR168a</i>   | TCGCTTGGTGCAGATCGGGAC    | CTCAACTGGTGTCGTGGAGTCGGCAATTCAGTTGAGGTCCCGAT |
| 2        | <i>novel-158</i> | AGGGATGGTATGCACTGAAGC    | CTCAACTGGTGTCGTGGAGTCGGCAATTCAGTTGAGGCTTCAGT |
| 3        | <i>novel-57</i>  | TACAACCGGCTTAGACACAAGA   | CTCAACTGGTGTCGTGGAGTCGGCAATTCAGTTGAGTCTTGTGT |
| 4        | <i>miR393</i>    | CTCCAAAGGGATCGCATTGAT    | CTCAACTGGTGTCGTGGAGTCGGCAATTCAGTTGAGATCAATGC |
| 5        | <i>novel-215</i> | ACTCTGTAGTACGTAGTATGTAGG | CTCAACTGGTGTCGTGGAGTCGGCAATTCAGTTGAGCCTACATA |
| 6        | <i>miR408a</i>   | CTGCACTGCCTCTTCCCTGGC    | CTCAACTGGTGTCGTGGAGTCGGCAATTCAGTTGAGGCCAGGGA |
| 7        | <i>miR396</i>    | TCCACAGGCTTTCTTGAAGTG    | CTCAACTGGTGTCGTGGAGTCGGCAATTCAGTTGAGCAGTTCAA |
| 8        | <i>miR156</i>    | TGACAGAAGAGAGTGAGCAC     | CTCAACTGGTGTCGTGGAGTCGGCAATTCAGTTGAGGTGCTCAC |
| 9        | <i>miR167</i>    | TGAAGCTGCCAGCATGATCTG    | CTCAACTGGTGTCGTGGAGTCGGCAATTCAGTTGAGCAGATCAT |
| 10       | <i>miR408e</i>   | CTGCACTGACTCTTCCCTGGC    | CTCAACTGGTGTCGTGGAGTCGGCAATTCAGTTGAGGCCAGGGA |
