# Supplementary material for: Identification of Low-Nitrogen-Related miRNAs and Their Target Genes in Sugarcane and the Role of miR156 in Nitrogen Assimilation
Source: MDPI journal article supplement (doi:10.3390/ijms232113187), 2022-10-29
Supplement: s1 [file s1]

Table S2 The filtering information results of primary data

| Sample | Total reads             | Low quality reads | 5' adapter<br>contaminated | 3' adapter<br>null or insert<br>null | PloyA/T/G/C       | Clean reads            |
|--------|-------------------------|-------------------|----------------------------|--------------------------------------|-------------------|------------------------|
| RRT1   | 12,524,008<br>(100.00%) | 15,868<br>(0.13%) | 13,645<br>(0.11%)          | 319,935<br>(2.55%)                   | 25,887<br>(0.21%) | 12,148,671<br>(97.00%) |
| RRT2   | 14,692,677<br>(100.00%) | 24,429<br>(0.17%) | 9,825<br>(0.07%)           | 218,573<br>(1.49%)                   | 42,021<br>(0.29%) | 14,397,828<br>(97.99%) |
| RRT3   | 14,238,990<br>(100.00%) | 17,138<br>(0.12%) | 17,844<br>(0.13%)          | 119,877<br>(0.84%)                   | 24,257<br>(0.17%) | 14,059,874<br>(98.74%) |
| RRCK1  | 13,028,628<br>(100.00%) | 26,444<br>(0.20%) | 9,237<br>(0.07%)           | 135,379<br>(1.04%)                   | 37,550<br>(0.29%) | 12,820,003<br>(98.40%) |
| RRCK2  | 12,442,229<br>(100.00%) | 23,684<br>(0.19%) | 6,442<br>(0.05%)           | 563,885<br>(4.53%)                   | 31,589<br>(0.25%) | 11,816,613<br>(94.97%) |
| RRCK3  | 12,835,710<br>(100.00%) | 23,915<br>(0.19%) | 7,651<br>(0.06%)           | 224,149<br>(1.75%)                   | 38,741<br>(0.30%) | 12,541,239<br>(97.71%) |

Notes: total reads, the total number of sequential data; low quality reads, the ratio of the number of reads removed due to low quality to the total number of raw reads; 5 adapter contaminate, the ratio of the number of reads removed due to the inclusion of 5' joints to the total number of raw reads; 3 adapter null or insert null, the ratio of the number of reads removed due to the absence of 3' joints to the total number of raw reads; ployA/T/G/C, the ratio of the number of reads removed because of ployA/T/G/C to the total number of raw reads; clean reads, the ratio of the number of clean reads to the total number of raw reads. RRCK, the roots of ROC22 under low N stress for 0 h; RRT, the roots of ROC22 under low N stress for 3 h.
