# Supplementary material for: Identification of Low-Nitrogen-Related miRNAs and Their Target Genes in Sugarcane and the Role of miR156 in Nitrogen Assimilation
Source: MDPI journal article supplement (doi:10.3390/ijms232113187), 2022-10-29
Supplement: s1 [file s1]

**Table S4** The qRT-PCR primers for miRNAs and their potential target genes in sugarcane

| Group ID | MiRNA/target     | Gene ID                    | Forward primer                   | Reverse primer       |
|----------|------------------|----------------------------|----------------------------------|----------------------|
| 1        | <i>P5CS</i>      | sample Cluster-9046.62773  | ACGGACAGTCTGCTTGACAG             | TCGTGTCGTTGGTGAGACTG |
| 2        | <i>acnA</i>      | sample Cluster-1234.10611  | TGGCTGCCCCATGAAAGTCAA            | GTCGGGTTCAAGGGTTTTGC |
| 3        | <i>SPX</i>       | sample Cluster-9046.203583 | GCGCTCAACTACACTGGACT             | TCGCTGTCGCTGTCTTCTTT |
| 4        | <i>GS</i>        | sample Cluster-9046.93347  | GTGGCCGTCTGTTCCCATAA             | GCAAAGACCCCAACAAGCTG |
| 5        | <i>AUX/IAA</i>   | sample Cluster-9046.46359  | TGACGAAGTTGATGGGAGGC             | CCCACGGAACATCTCCAACA |
| 6        | <i>TIR1</i>      | sample Cluster-82409.0     | CGAAGGGATGCTCCACCTTT             | GGTATCCCAGTGCAACACCA |
| 7        | <i>ACO1</i>      | sample Cluster-9046.137637 | GGAGAGCACCTTCTTCGTCC             | GATGCGAACTGCTTCGTCAC |
| 8        | <i>NiFU</i>      | sample Cluster-9046.167793 | AGCGATGGACTCAACTGCAA             | GCTACAAGGAGCATGTGGGT |
| 9        | <i>ARF</i>       | sample Cluster-9046.156023 | CTGGGCCTCAAGGCCAAATA             | TGACCAAGTGAACCGACCAC |
| 10       | <i>SPL1</i>      | sample Cluster-9046.200116 | GTAGCCGATGGGGACAACAA             | CGTCAACCTGACAAGACGGA |
| 11       | <i>GRF</i>       | sample Cluster-9046.236180 | GGCGTTTCAATGTGGGAGTA             | CGAGGGGCTTCACCATTGAT |
| 12       | <i>AGO</i>       | sample Cluster-9046.39783  | CACAATGTACGCAGCACAA              | AATTCGTGGTCACCTTGCCT |
| 13       | <i>PC</i>        | sample Cluster-9046.239128 | GAAGATGGGGACGACGAAGG             | GTTAGGCTATCTCCCGGTGC |
| 14       | <i>GADPH</i>     |                            | CACGGCCACTGGAAGCA                | TCCTCAGGGTTCCTGATGCC |
| 15       | <i>miR168a</i>   |                            | ACACTCCAGCTGGGTCGCTTGGTGACAGAT   | TGGTGTCGTGGAGTCG     |
| 16       | <i>novel-158</i> |                            | ACACTCCAGCTGGGAGGGATGGTATGCAC    | TGGTGTCGTGGAGTCG     |
| 17       | <i>novel-57</i>  |                            | ACACTCCAGCTGGGTACAACCGGCTTAGAC   | TGGTGTCGTGGAGTCG     |
| 18       | <i>miR393</i>    |                            | ACACTCCAGCTGGGCTCCAAAGGGATCGC    | TGGTGTCGTGGAGTCG     |
| 19       | <i>novel-215</i> |                            | ACACTCCAGCTGGGACTCTGTAGTACGTAGTA | TGGTGTCGTGGAGTCG     |
| 20       | <i>miR408a</i>   |                            | ACACTCCAGCTGGGCTGCACTGCCTCTTC    | TGGTGTCGTGGAGTCG     |
| 21       | <i>miR396</i>    |                            | ACACTCCAGCTGGGTCCACAGGCTTTCTT    | TGGTGTCGTGGAGTCG     |
| 22       | <i>miR156</i>    |                            | ACACTCCAGCTGGGTGACAGAAGAGAGT     | TGGTGTCGTGGAGTCG     |
| 23       | <i>miR167</i>    |                            | ACACTCCAGCTGGGTGAAGCTGCCAGCAT    | TGGTGTCGTGGAGTCG     |
| 24       | <i>miR408e</i>   |                            | ACACTCCAGCTGGGCTGCACTGACTCTTC    | TGGTGTCGTGGAGTCG     |
