# Supplementary material for: Identification of Low-Nitrogen-Related miRNAs and Their Target Genes in Sugarcane and the Role of miR156 in Nitrogen Assimilation
Source: MDPI journal article supplement (doi:10.3390/ijms232113187), 2022-10-29
Supplement: s1 [file s1]

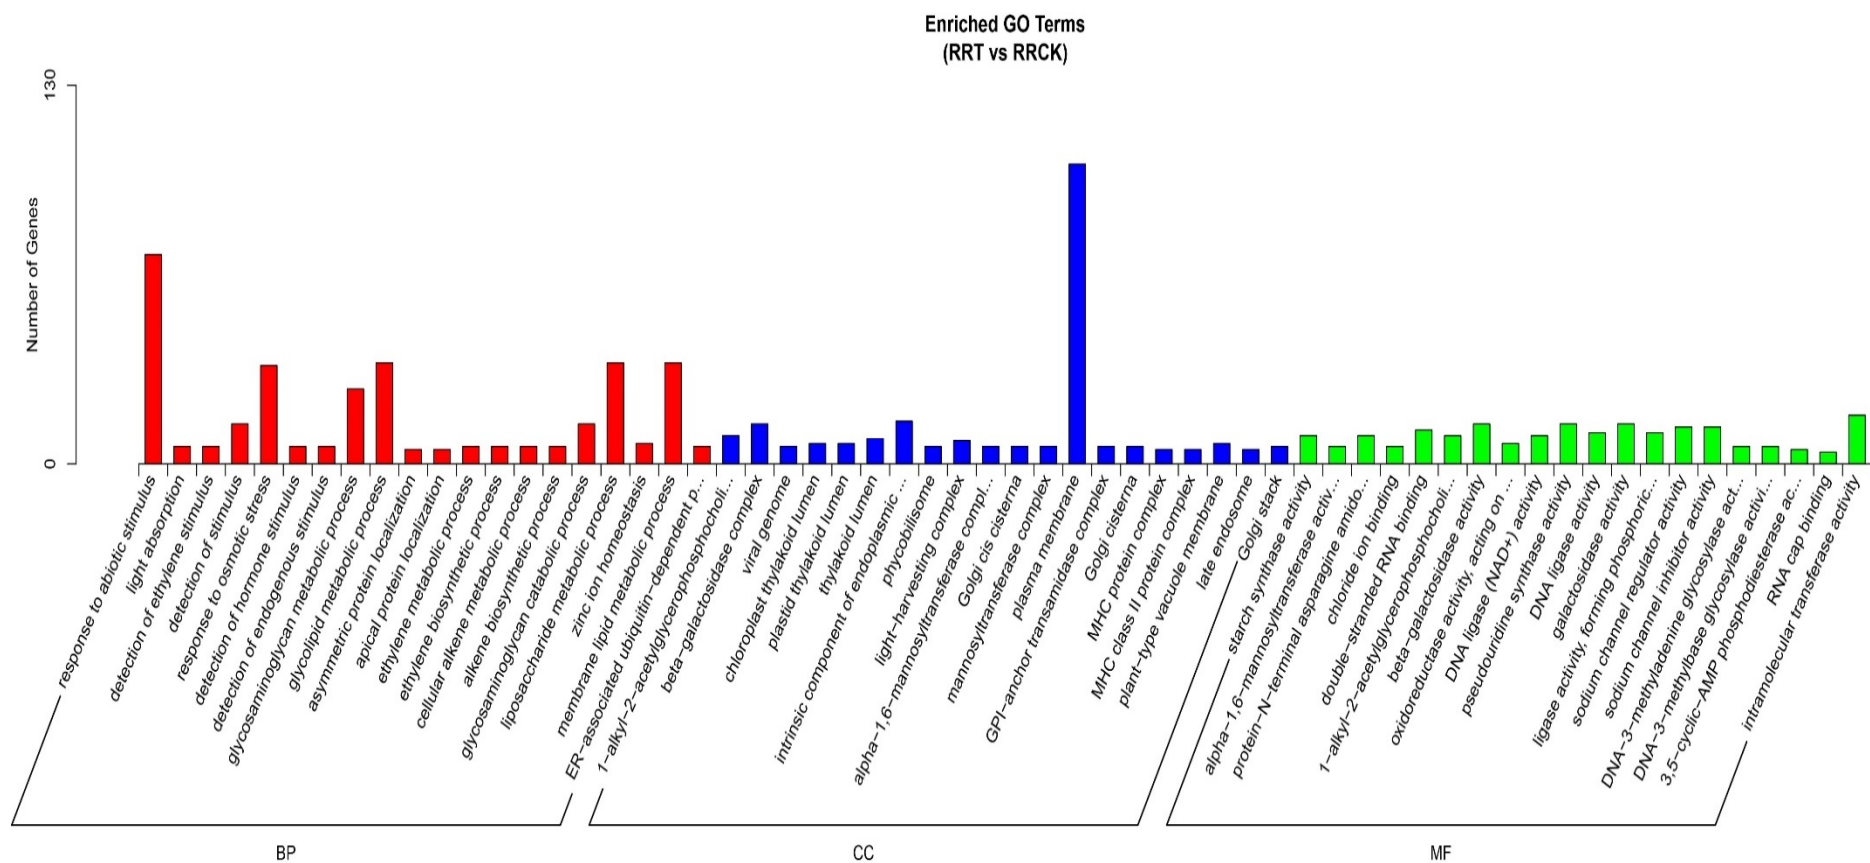

**Figure S2.** GO analysis of candidate target genes of differentially expressed miRNAs

Notes: BP, biological process; CC, cellular component; MF, molecular function; RRCK, the roots of ROC22 under low N stress for 0 h; RRT, the roots of ROC22 under low N stress for 3 h.
