# Supplementary material for: Identification of Low-Nitrogen-Related miRNAs and Their Target Genes in Sugarcane and the Role of miR156 in Nitrogen Assimilation
Source: MDPI journal article supplement (doi:10.3390/ijms232113187), 2022-10-29
Supplement: s1 [file s1]

**Table S1** The quality assessment results for raw data

| Sample | Read       | Base/G | Q20/% | Q30/% | GC content/% |
|--------|------------|--------|-------|-------|--------------|
| RRT1   | 12,524,008 | 0.626  | 98.96 | 98.05 | 52.12        |
| RRT2   | 14,692,677 | 0.735  | 98.90 | 98.01 | 51.94        |
| RRT3   | 14,238,990 | 0.712  | 98.98 | 98.08 | 52.44        |
| RRCK1  | 13,028,628 | 0.651  | 98.73 | 97.76 | 51.05        |
| RRCK2  | 12,442,229 | 0.622  | 98.76 | 97.82 | 51.63        |
| RRCK3  | 12,835,710 | 0.642  | 98.76 | 97.82 | 51.39        |

Notes: Reads, the basic unit of sequence data; Bases, the number of sequences multiplied by its length; Q20/Q30, the ratio of bases with Phred (base mass value) greater than 20 or 30 to the total number of bases; GC content, the sum of G and C bases to the total number of bases. Error rate of all samples was 0.01%. RRCK, the roots of ROC22 under low N stress for 0 h; RRT, the roots of ROC22 under low N stress for 3 h.
